# Supplementary material for: Transcriptional Dysregulation Study Reveals a Core Network Involving the Progression of Alzheimer's Disease
Source: Front Aging Neurosci. 2019 May 7;11:101. doi: 10.3389/fnagi.2019.00101 (PMC6513962; doi:10.3389/fnagi.2019.00101)
Supplement: Table S8 — The dysregulated genes and the WGCNA analysis results. [file Table_8.XLSX]

## Sheet: S7 WGCNA results
modules	module.size	dysregulated.genes
green	2614	SLC25A14,SLC1A2,FN1,ARID1A,BEX1,CHL1,YWHAB
blue	7776	ARID1B,ASNS,MAP2,APLP2,RAPGEF4,SCG3,NCALD,GABRG2,CSF3R,NDUFA1,COX6B1,RIN2,SLCO2B1,ARHGAP20,TAGLN3,EBP,GSTO1,TMEM178A,UTRN,C14orf2,SYNJ1,PSMD4,CAMLG,STAT3,INPP5D,CXCR6,AFF1,PPARA,HN1,VDAC1
royalblue	5042	ATP1A2,AP2S1,ADCYAP1R1,GARS,TPI1,SUCLA2,NOVA1,APP,EIF4EBP2,FLI1,PFKFB3,PGAM1,CNTNAP2,CDC42EP4
paleturquoise	247
darkviolet	108
salmon	1892	SLC6A7,AMPH,AP1S1,CLTA,LAMC1,GRM8,NDUFB1,PPIA,PPP3CB-AS1
midnightblue	343
skyblue	248
navajowhite1	54
honeydew1	199	ENO2,SHC3
coral2	128
darkred	348
mediumpurple3	752	ARPC5L
greenyellow	1355	ARF5,PITHD1,SALL2,NDUFS3
brown4	192
grey	2145	NOTCH2,ASXL2,VAT1L,CHRM4,HS6ST3
cyan	1428	ABCB1,GDAP1L1,GABRG3
ivory	131
darkolivegreen	653	RTN3,PAK1,SERPINI1,PRKCE,SLC35F1
lightcoral	41
darkorange	347	FRMPD3
darkturquoise	268
skyblue1	181
lightsteelblue1	99	NSF
lavenderblush3	318	GABRA3,PGK1,PARP4
darkolivegreen4	37
darkgrey	270	MAP1B,PRKACB,BNIP3
lightyellow	193
lightsteelblue	89
darkslateblue	185	DOCK3,FRMD6
darkseagreen4	56
antiquewhite4	107	LRP1,TGFBR2
mediumorchid	53	PFDN2
thistle3	30
lightpink4	60
brown2	302	CD83
blue2	118	PTPRB
grey60	215	CALY
firebrick4	152
maroon	60	PRNP
orange	147
thistle	27
magenta4	22
